# Supplementary material
Source: publisher figshare collection journal article supplement (https://tandf.figshare.com/articles/dataset/_/23500394)
Supplement: Supplementary file 1 [file 1]

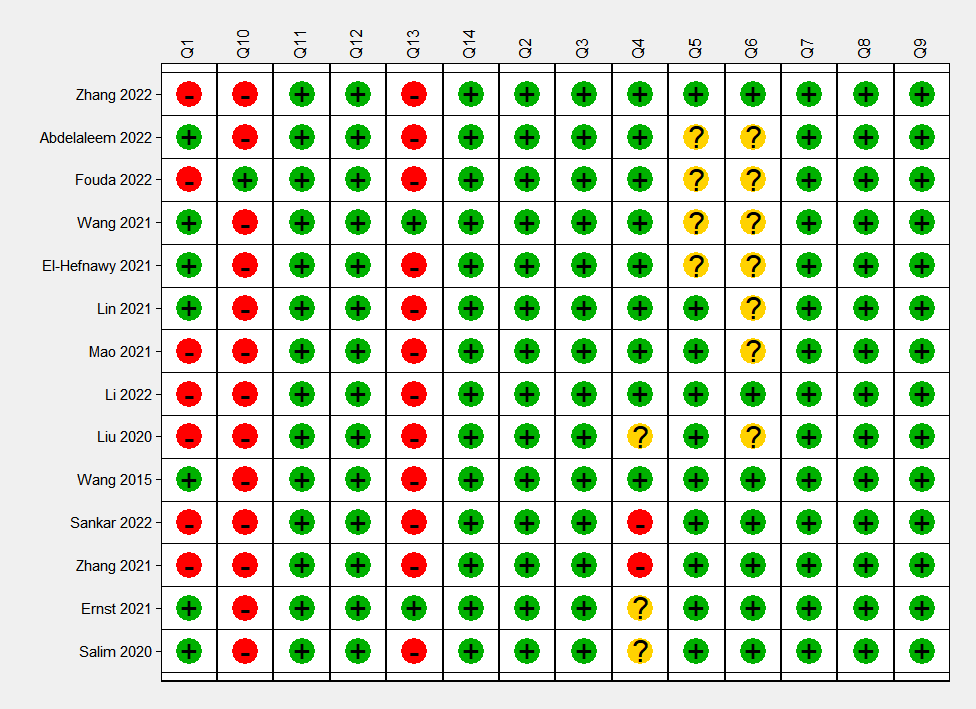


Quality evaluation of included literature.

Question:

1. Does the case spectrum include a variety of cases and cases of confusing diseases? (Disease spectrum composition)

2. Are the selection criteria for study subjects clear? (selection criteria)

3. Can the gold standard accurately distinguish between diseased and disease-free states? (gold standard)

4.Is the interval between the gold standard and the test to be evaluated short enough to avoid changes in the condition of the disease? (disease progression bias)

5. Are all samples or randomly selected samples subjected to the gold standard test? (partial reference bias)

6. Are all cases receiving the same gold standard test, regardless of the outcome of the test to be evaluated? (multiple reference bias)

7. Are the gold standard tests independent of the test to be evaluated (ie, the test to be evaluated is not included in the gold standard)? (mixed bias)

8. Are the procedures to be evaluated clearly described and reproducible? (Implementation of the test to be evaluated)

9.Are the operations of gold standard tests clearly described and reproducible? (Implementation of gold standard)

10. Is the result interpretation of the test to be evaluated performed without knowledge of the gold standard test results? (Experimental interpretation bias)

11. Is the result interpretation of the gold standard performed without knowledge the results of the tests to be evaluated? (gold standard interpretation bias)

12. Are the clinical data available when interpreting the trial results consistent with the clinical data available in practice? (clinical interpretation bias)

13. Are inexplicable/intermediate trial results reported? (unexplainable test results)

14. Are there explanations for cases withdrawn from the study? (exit case)
